# Supplementary material for: How Speededness of a Reasoning Test and the Complexity of Mental Speed Tasks Influence the Relation between Mental Speed and Reasoning Ability
Source: MDPI journal article supplement (doi:10.3390/jintelligence11050089), 2023-05-08
Supplement: s1 [file s1]

This document provides the codebook for all variables in the dataset used in the study titled "How speededness of a reasoning test and the complexity of mental speed tasks influence the relation between mental speed and reasoning ability".

|             |                                                             |
|-------------|-------------------------------------------------------------|
| Vpn         | anonymous identifier of participant                         |
| age         | age in years                                                |
| Intelligenz | IQ based on CFT                                             |
| CFT         | sum score CFT                                               |
| Sex         | 1 = female; 2 = male                                        |
| H0MW        | mean response latency of first Hick task [in milliseconds]  |
| H1MW        | mean response latency of second Hick task [in milliseconds] |
| H2MW        | mean response latency of third Hick task [in milliseconds]  |
| A1-A15      | Items of Series (CFT) 0 = incorrect; 1 = correct            |
| B1-B15      | Items of Classifications (CFT) 0 = incorrect; 1 = correct   |
| C1-C15      | Items of Matrices (CFT) 0 = incorrect; 1 = correct          |
| D1-D11      | Items of Topologies (CFT) 0 = incorrect; 1 = correct        |
