# Supplementary material for: How Speededness of a Reasoning Test and the Complexity of Mental Speed Tasks Influence the Relation between Mental Speed and Reasoning Ability
Source: MDPI journal article supplement (doi:10.3390/jintelligence11050089), 2023-05-08
Supplement: s1 [file s1]

# Supplementary Materials: How Speededness of a Reasoning Test and the Complexity of Mental Speed Tasks Influence the Relation between Mental Speed and Reasoning Ability

**Table S1.** Unstandardized and standardized factor loadings of the model with basic and complexity-related mental speed, reasoning ability controlled for speededness, and speededness.

|     | <b>S Reasoning</b><br>unstandardized | standardized | <b>S Speededness</b><br>unstandardized | standardized |
|-----|--------------------------------------|--------------|----------------------------------------|--------------|
| S4  | 0.331                                | 0.252        |                                        |              |
| S5  | 0.184                                | 0.255        |                                        |              |
| S6  | 0.207                                | 0.259        |                                        |              |
| S7  | 0.279                                | 0.254        |                                        |              |
| S8  | 0.418                                | 0.258        |                                        |              |
| S9  | 0.392                                | 0.261        |                                        |              |
| S10 | 0.444                                | 0.258        |                                        |              |
| S11 | 0.357                                | 0.255        |                                        |              |
| S12 | 0.400                                | 0.263        | 0.151                                  | 0.207        |
| S13 | 0.460                                | 0.256        | 0.287                                  | 0.332        |
| S14 | 0.477                                | 0.264        | 0.390                                  | 0.451        |
| S15 | 0.500                                | 0.261        | 0.462                                  | 0.503        |
|     | <b>C Reasoning</b><br>unstandardized | standardized | <b>C Speededness</b><br>unstandardized | standardized |
| C2  | 0.184                                | 0.196        |                                        |              |
| C3  | 0.140                                | 0.193        |                                        |              |
| C4  | 0.196                                | 0.188        |                                        |              |
| C5  | 0.342                                | 0.192        |                                        |              |
| C6  | 0.347                                | 0.196        |                                        |              |
| C7  | 0.352                                | 0.189        |                                        |              |
| C8  | 0.436                                | 0.197        | 0.165                                  | 0.121        |
| C9  | 0.466                                | 0.195        | 0.290                                  | 0.198        |
| C10 | 0.483                                | 0.197        | 0.395                                  | 0.263        |
| C11 | 0.436                                | 0.192        | 0.403                                  | 0.289        |
| C12 | 0.462                                | 0.200        | 0.449                                  | 0.317        |
| C13 | 0.444                                | 0.201        | 0.439                                  | 0.325        |
| C14 | 0.497                                | 0.200        | 0.495                                  | 0.325        |
| C15 | 0.325                                | 0.182        | 0.324                                  | 0.296        |
|     | <b>M Reasoning</b><br>unstandardized | standardized | <b>M Speededness</b><br>unstandardized | standardized |
| M5  | 0.424                                | 0.157        |                                        |              |
| M6  | 0.313                                | 0.155        |                                        |              |
| M7  | 0.263                                | 0.155        |                                        |              |
| M8  | 0.342                                | 0.158        |                                        |              |
| M9  | 0.407                                | 0.157        |                                        |              |
| M10 | 0.430                                | 0.156        | 0.162                                  | 0.197        |
| M11 | 0.380                                | 0.157        | 0.237                                  | 0.329        |
| M12 | 0.492                                | 0.157        | 0.402                                  | 0.432        |
| M13 | 0.472                                | 0.159        | 0.436                                  | 0.495        |

|            |                         |                     |                           |                     |
|------------|-------------------------|---------------------|---------------------------|---------------------|
| M14        | 0.496                   | 0.157               | 0.481                     | 0.512               |
| M15        | 0.352                   | 0.154               | 0.348                     | 0.512               |
|            | <b>T Reasoning</b>      |                     | <b>T Speededness</b>      |                     |
|            | <b>unstandardized</b>   | <b>standardized</b> | <b>unstandardized</b>     | <b>standardized</b> |
| T1         | 0.156                   | 0.280               |                           |                     |
| T2         | 0.384                   | 0.273               |                           |                     |
| T3         | 0.449                   | 0.280               |                           |                     |
| T4         | 0.184                   | 0.277               |                           |                     |
| T5         | 0.331                   | 0.279               | 0.125                     | 0.128               |
| T6         | 0.319                   | 0.288               | 0.199                     | 0.218               |
| T7         | 0.466                   | 0.281               | 0.381                     | 0.279               |
| T8         | 0.474                   | 0.283               | 0.438                     | 0.318               |
| T9         | 0.492                   | 0.276               | 0.477                     | 0.326               |
| T10        | 0.367                   | 0.271               | 0.363                     | 0.326               |
| T11        | 0.307                   | 0.272               | 0.305                     | 0.330               |
|            | <b>Hick basic speed</b> |                     | <b>Hick complex speed</b> |                     |
|            | <b>unstandardized</b>   | <b>standardized</b> | <b>unstandardized</b>     | <b>standardized</b> |
| Hick 0-bit | 1                       | 0.808               | 1                         | 0.280               |
| Hick 1-bit | 1                       | 0.758               | 2                         | 0.525               |
| Hick 2-bit | 1                       | 0.495               | 4                         | 0.685               |
